# Supplementary material for: Uncoupling Splicing From Transcription Using Antisense Oligonucleotides Reveals a Dual Role for I Exon Donor Splice Sites in Antibody Class Switching
Source: PubMed Central journal article supplement (PMC7233311; doi:10.3389/fimmu.2020.00780), 2020-05-08
Supplement: Data_Sheet_1.pdf [file Data_Sheet_1.pdf]

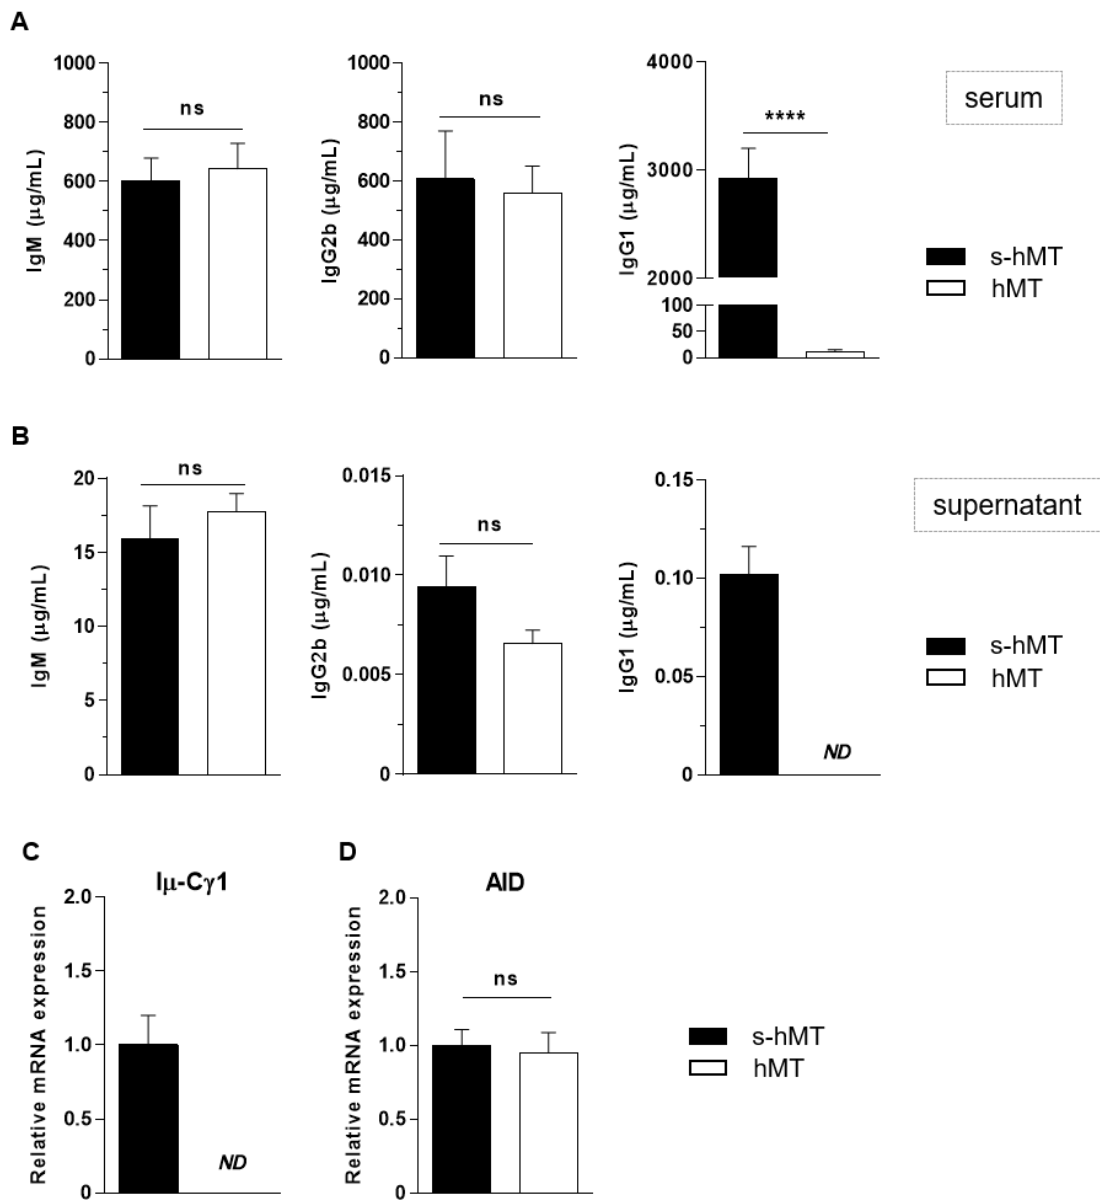

### Supplementary figure 1. Defect of IgG1 class switching in mice lacking $I\gamma 1$ dss

(A) Quantification of Ig isotypes (IgM, IgG2b, and IgG1) in sera of homozygous *s-hMT* and *hMT* mice by ELISA. (B-D) Splenic B cells were isolated from homozygous *s-hMT* and *hMT* mice and stimulated with LPS. After 4 days stimulation, amounts of Ig isotypes (IgM, IgG2b, and IgG1) were determined in culture supernatants by ELISA (B). After 3 days stimulation, post-switch  $I\mu\text{-C}\gamma 1$  (C) and AID (D) mRNA expression relative to GAPDH mRNA expression was monitored by quantitative RT-PCR. Expression of  $I\mu\text{-C}\gamma 1$  or AID in B cells from *s-hMT* mice was normalized to 1. Data are means  $\pm$  SEM,  $n=3$  to 4 for each genotype. Unpaired two-tailed Student's *t* test was used to determine significance. ND: not detected, ns: non significant, \*\*\*\*  $P < 0.0001$ .

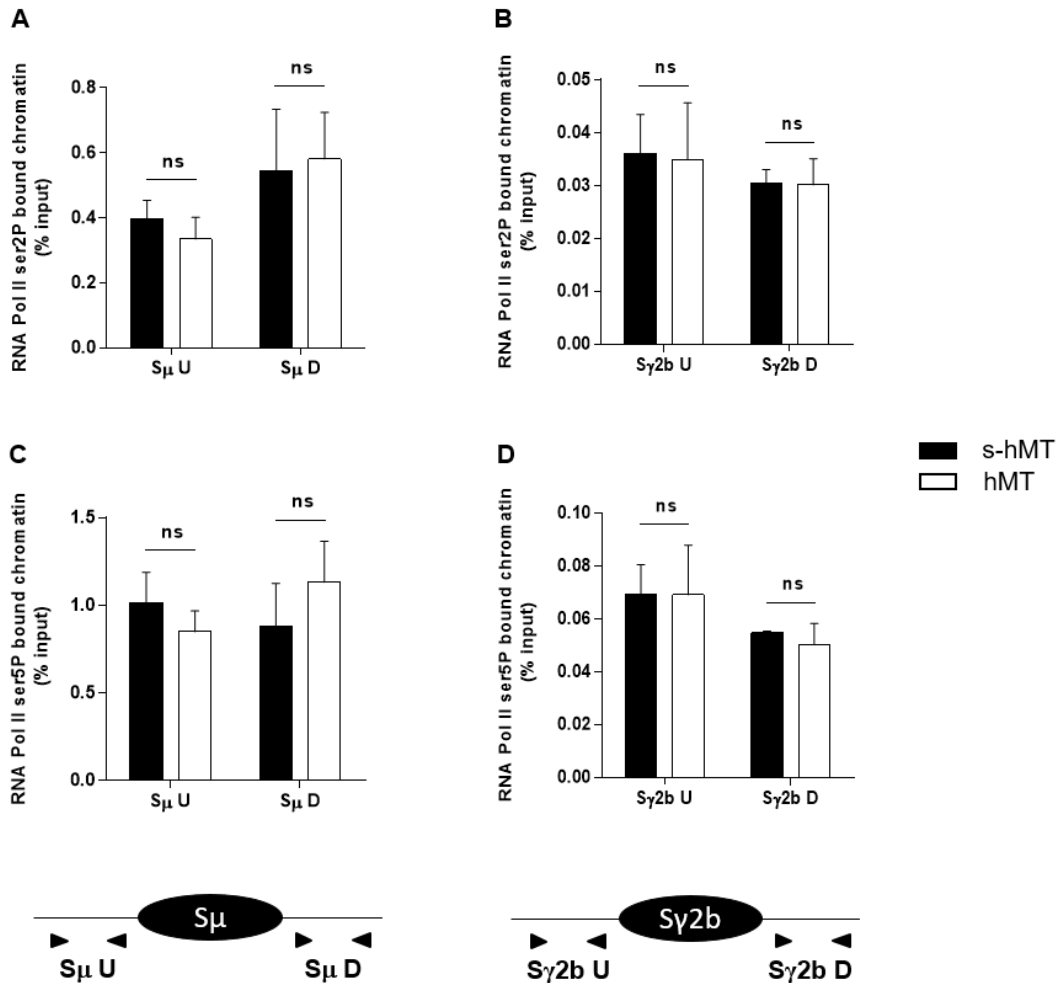

**Supplementary figure 2. Similar RNA pol II binding in S $\mu$  and S $\gamma$ 2b regions of *s-hMT* and *hMT* mice**

Splenic B cells were isolated from homozygous *s-hMT* and *hMT* mice and stimulated with LPS. After 2 days, the cells were analyzed for Ser2P RNA pol II (A, B) and Ser5P RNA pol II (C, D) levels in S $\mu$  (A, C) and S $\gamma$ 2b (B, D) regions by ChIP coupled to quantitative PCR. Background signals from mock samples with irrelevant antibody were subtracted. Values were normalized to total input DNA. Primers (triangles) used for quantitative PCR are described on the illustrative schema (bottom). Data are means  $\pm$  SEM of at least two independent experiments, n=4 for each genotype. Unpaired two tailed Student's t test was used to determine significance. ns: non significant.

### Supplementary figure 3: Sequences of $\gamma 1$ constitutive and alternative spliced transcripts

The sequences of  $I\gamma 1$  exon (bold) and CH1 $\gamma 1$  exon are indicated. Donor (red) and acceptor (green) splice sites are also represented.

#### Constitutive $\gamma 1$ transcript:

**GTCAATCATATGATGGAAAGAGGGTAGCATTACCTCTCTGGGACAAAGGCT  
GTGACTCTGGGAAAGACAAGAGAAGGGCAGGACCAAACAGGAACAGAGAC  
GGCTGCTTTCACAGCTTCCACATGTGAGTGGGGTCAGCAGGGAAAGGAGCT  
GCAAGAAGAGGCCATACAAACAGCACGCATCTGTGGCCCTTCCAGATCTTTG  
AGTCATCCTATCACGGGAGATTGGGAAGGAGTTGACAGACCAGCCCAGGCA  
GAGGAAGCCTCTGTGTAAAGAGTAAAGGTGCTTGCCTACAGCCTGGTGTCA  
ACTAGGCAGGCCCTGGGGGGCCGGGAAGGGGCCTCCTAGACAAGCACAGGC  
ATGTAGAGCTGCACACCCACAGACAAACCTGAGCCCCGAGGATATCATGG  
AATATATCGAGAAGCCTGAGGAATGTGTTTGGCATGGACTACAGGTTGAGAG  
AACCAAGGAAGCTGAGCCCTGCGCAAACGACACCCCATCTGTCTATCCAC  
TGGCCCCTGGATCTGCTGCCCAAACCTCCATGGTGACCCTGGGATGCCTGGT  
CAAGGGCTATTTCCCTGAGCCAGTGACAGTGACCTGGAACCTCTGGATCCCTGTCC  
AGCGGTGTGCACACCTTCCAGCTGTCCTGCAGTCTGACCTCTACACTCTGAGCA  
GCTCAGTGACTGTCCCCTCCAGCACCTGGCCCAGCCAGACCGTCACCTGCAACGT  
TGCCCACCCGGCCAGCAGCACCAAGGTGGACAAGAAAATTG**

#### Alternative $\gamma 1$ transcript 1:

**GTCAATCATATGATGGAAAGAGGGTAGCATTACCTCTCTGGGACAAAGGCT  
GTGACTCTGGGAAAGACAAGAGAAGGGCAGGACCAAACAGGAACAGAGAC  
GGCTGCTTTCACAGCTTCCACATACAAACCTGAGCCCCGAGGATATCATGGA  
ATATATCGAGAAGCCTGAGGAATGTGTTTGGCATGGACTACAGGTTGAGAGA  
ACCAAGGAAGCTGAGCCCTGCGCAAACGACACCCCATCTGTCTATCCACT  
GGCCCCTGGATCTGCTGCCCAAACCTCCATGGTGACCCTGGGATGCCTGGTC  
AAGGGCTATTTCCCTGAGCCAGTGACAGTGACCTGGAACCTCTGGATCCCTGTCCA  
GCGGTGTGCACACCTTCCAGCTGTCCTGCAGTCTGACCTCTACACTCTGAGCAG  
CTCAGTGACTGTCCCCTCCAGCACCTGGCCCAGCCAGACCGTCACCTGCAACGTT  
GCCACCCGGCCAGCAGCACCAAGGTGGACAAGAAAATTG**

#### Alternative $\gamma 1$ transcript 2:

**GTCAATCATATGATGGAAAGAGGGTAGCATTACCTCTCTGGGACAAAGGCT  
GTGACTCTGGGAAAGACAAGAGAAGGGCAGGACCAAACAGGAACAGAGAC  
GGCTGCTTTCACAGCTTCCACATCCAAACGACACCCCATCTGTCTATCCACT  
GGCCCCTGGATCTGCTGCCCAAACCTCCATGGTGACCCTGGGATGCCTGGTC  
AAGGGCTATTTCCCTGAGCCAGTGACAGTGACCTGGAACCTCTGGATCCCTGTCCA  
GCGGTGTGCACACCTTCCAGCTGTCCTGCAGTCTGACCTCTACACTCTGAGCAG**

CTCAGTGACTGTCCCCTCCAGCACCTGGCCCAGCCAGACCGTCACCTGCAACGTT  
GCCACCCCGGCCAGCAGCACCAAGGTGGACAAGAAAATTG

**Alternative  $\gamma$ 1 transcript 3:**

**GTCAATCATATGATGGAAAGAGGGTAGCATTACCTCTCTGGGACAAAGGCT  
GTGACTCTGGGAAAGACAAGAGAAGGGCAGGACCAAACAGGAACAGAGAC  
GGCTGCTTTCACAGCTTCCACATGAGTGGGGTCAGCAGGGAAAGGAGCT  
GCAAGAAGAGGCCATACAAACAGCACGCATCTGTGGCCCTTCCAGATCTTTG  
AGTCATCCTATCACGGGAGATTGGGAAGGAGTTGACAGACCAGCCCAGGCA  
GAGGAAGCCTCTGTGTTAAAGAGTAAAGCCAAAACGACACCCCATCTGTCTA  
TCCACTGGCCCCTGGATCTGCTGCCCAAATACTCCATGGTGACCCTGGGATGC  
CTGGTCAAGGGCTATTTCCCTGAGCCAGTGACAGTGACCTGGAACCTGGATCCC  
TGTCCAGCGGTGTGCACACCTTCCCAGCTGTCCTGCAGTCTGACCTCTACACTCTG  
AGCAGCTCAGTGACTGTCCCCTCCAGCACCTGGCCCAGCCAGACCGTCACCTGCA  
ACGTTGCCACCCGGCCAGCAGCACCAAGGTGGACAAGAAAATTG**

**A**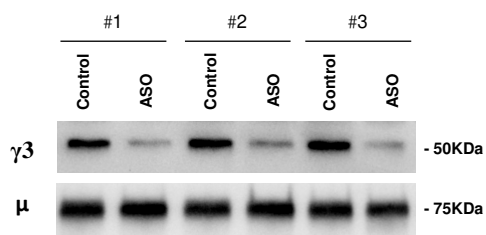**B**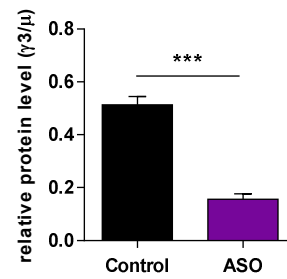

#### Supplementary figure 4. Decreased $\gamma 3$ heavy chain protein levels in B cells treated by I $\mu$ exon dss ASO

Splenic B cells were isolated from *C57BL/6* mice, stimulated with 5  $\mu\text{g/ml}$  LPS and treated with 4  $\mu\text{M}$  I $\mu$  dss ASO or an irrelevant control ASO for 4 days. **(A)**  $\gamma 3$  and  $\mu$  heavy chain protein levels were analyzed by Western Blot. **(B)** Quantification of  $\gamma 3$  heavy chain protein expression relative to  $\mu$  heavy chain protein expression. Data are means  $\pm$  SEM,  $n=3$  for each group. Unpaired two-tailed Student's *t* test was used to determine significance.  $*** P < 0.001$ .
